# Supplementary material
Source: HighWire-hosted journal article supplement (https://jnm.snmjournals.org/highwire/filestream/104734/field_highwire_adjunct_files/0/262528_Supplemental_Data.pdf)
Supplement: 262528_Supplemental_Data.pdf [file 262528_Supplemental_Data.pdf]

**Supplemental Table 1**  
**Repeatability of MTV<sub>lesion</sub> with regard to SUV<sub>max</sub>**

| <b>Minimum SUV<sub>max</sub> of the<br/>regarded lesions</b> | <b>RC%</b> |
|--------------------------------------------------------------|------------|
| 1                                                            | 76.9       |
| 6                                                            | 62.8       |
| 11                                                           | 57.0       |
| 16                                                           | 44.5       |
| 21                                                           | 49.3       |
| 26                                                           | 53.1       |
| 31                                                           | 10.7       |
| 36                                                           | 12.2       |
| 41                                                           | 12.2       |
